# Supplementary material
Source: publisher figshare collection journal article supplement (https://tandf.figshare.com/ndownloader/files/20776251)
Supplement: Supplementary file 1 [file 20776251]

## Sheet: Sheet1
Cq
Act2	WT-21-1	WT-21-2	WT-21-3	OE1-21-1	OE1-21-2	OE1-21-3	OE2-21-1	OE2-21-2	OE2-21-3	WT-38-1	WT-38-2	WT-38-3	OE1-38-1	OE1-38-2	OE1-38-3	OE2-38-1	OE2-38-2	OE2-38-3	WT-45-1	WT-45-2	WT-45-3	OE1-45-1	OE1-45-2	OE1-45-3	OE2-45-1	OE2-45-2	OE2-45-3
1	19.3631	22.5487	21.1702	21.2623	18.8804	19.4411	20.6021	22.0713	21.9563	22.2878	19.3032	18.7485	19.6869	20.1438	19.865	19.8931	20.8201	19.4402	20.7066	21.2768	20.6736	21.4635	21.0693	22.9615	21.0115	21.5842	21.3789
2	18.707	22.2107	21.21	21.2559	18.9716	19.5656	20.4621	22.0946	22.4113	22.1213	19.3317	18.7627	19.8865	19.8799	19.9065	20.0369	20.5731	20.2099	21.5141	21.3949	20.6591	21.5367	21.0467	22.4843	21.0201	21.3793	21.8321
3	19.2995	22.3734	21.4375	21.3628	18.9989	19.8058	20.5167	22.2119	22.5766	22.1803	19.2755	18.4818	20.109	19.594	19.5693	19.8002	20.493	19.5925	21.1429	20.888	20.5922	21.1975	20.9262	22.2988	21.1583	21.2394	21.5207
Cq Mean	19.1232	22.3776	21.2726	21.2937	18.9503	19.6041	20.527	22.126	22.3147	22.1964	19.3035	18.6644	19.8941	19.8726	19.7802	19.91	20.6288	19.7475	21.1212	21.1866	20.6417	21.3992	21.014	22.5815	21.0633	21.401	21.5772
HsfA2	WT-21-1	WT-21-2	WT-21-3	OE1-21-1	OE1-21-2	OE1-21-3	OE2-21-1	OE2-21-2	OE2-21-3	WT-38-1	WT-38-2	WT-38-3	OE1-38-1	OE1-38-2	OE1-38-3	OE2-38-1	OE2-38-2	OE2-38-3	WT-45-1	WT-45-2	WT-45-3	OE1-45-1	OE1-45-2	OE1-45-3	OE2-45-1	OE2-45-2	OE2-45-3
1	27.5291	30.369	30.9356	30.3725	28.2982	29.6946	30.2623	30.8969	30.6536	17.996	15.4887	16.3021	17.6324	17.118	17.6068	18.5939	18.0872	17.6195	20.2939	21.3799	20.0328	21.0897	21.3841	20.9381	19.8029	19.7599	20.2824
2	27.6283	30.6391	30.8265	30.0713	28.1091	29.7762	30.7592	31.3207	30.9618	18.5076	16.1672	16.815	17.9659	17.5785	17.3919	17.9788	18.0689	17.3856	19.7912	21.0066	19.8271	20.9115	21.1278	21.0621	19.9257	19.7312	20.5195
3	27.5632	30.2979	30.7508	30.1424	28.0277	30.076	30.57	32.02	30.9543	18.4904	16.1654	16.8685	17.7445	17.1978	16.8292	17.5418	17.4552	17.0662	19.6222	20.1955	19.5105	21.1378	21.2641	21.1799	20.0029	19.6368	20.1777
Cq Mean	27.5735	30.4354	30.8376	30.1954	28.145	29.8489	30.5305	31.4126	30.8566	18.3313	15.9404	16.6619	17.7809	17.2981	17.2759	18.0382	17.8704	17.3571	19.9025	20.8607	19.7901	21.0464	21.2587	21.0601	19.9105	19.7093	20.3265
HsfB1	WT-21-1	WT-21-2	WT-21-3	OE1-21-1	OE1-21-2	OE1-21-3	OE2-21-1	OE2-21-2	OE2-21-3	WT-38-1	WT-38-2	WT-38-3	OE1-38-1	OE1-38-2	OE1-38-3	OE2-38-1	OE2-38-2	OE2-38-3	WT-45-1	WT-45-2	WT-45-3	OE1-45-1	OE1-45-2	OE1-45-3	OE2-45-1	OE2-45-2	OE2-45-3
1	22.1151	24.5488	24.9608	24.4856	23.12	24.04	24.54	25.4239	26.5587	19.1241	17.1027	16.9442	17.6801	17.1231	17.0699	17.3709	18.0731	17.8619	19.9541	20.8618	20.3328	20.5091	20.7629	20.9086	20.3091	20.3483	20.6655
2	23.0452	24.4504	25.3192	24.6752	23.0652	24.1652	24.0888	25.2017	25.5242	18.898	16.9718	16.8864	17.6552	17.3113	17.0916	17.6461	18.3507	18.0914	19.7843	20.4876	20.2183	20.2176	20.4271	20.586	20.3248	20.2734	21.0817
3	22.3757	23.465	25.5028	24.6256	23.1707	23.9172	24.9887	25.8676	25.3084	19.5577	17.4805	17.5041	18.4447	17.8105	17.7957	17.9769	18.4473	17.647	20.0645	20.3588	20.6391	19.9987	20.1783	20.3262	19.4523	19.9024	21.349
Cq Mean	22.512	24.1547	25.2609	24.5955	23.1186	24.0408	24.5391	25.4977	25.7971	19.1933	17.185	17.1116	17.9267	17.415	17.3191	17.6646	18.2904	17.8668	19.9343	20.5694	20.3967	20.2418	20.4561	20.6069	20.0287	20.1747	21.032
Hsp60	WT-21-1	WT-21-2	WT-21-3	OE1-21-1	OE1-21-2	OE1-21-3	OE2-21-1	OE2-21-2	OE2-21-3	WT-38-1	WT-38-2	WT-38-3	OE1-38-1	OE1-38-2	OE1-38-3	OE2-38-1	OE2-38-2	OE2-38-3	WT-45-1	WT-45-2	WT-45-3	OE1-45-1	OE1-45-2	OE1-45-3	OE2-45-1	OE2-45-2	OE2-45-3
1	20.0353	21.5307	22.6617	22.3109	20.2713	21.539	22.7349	23.656	24.0862	20.2529	18.7964	17.4696	18.5758	19.5562	19.3813	19.0865	19.5933	18.2356	20.0122	21.3097	20.5964	21.3104	22.0447	22.0391	21.4692	21.1679	21.3583
2	20.2581	22.1236	23.4331	21.7402	20.2573	21.4044	22.416	23.7713	23.6721	19.8048	18.5656	17.2422	18.2632	19.3429	19.3078	19.0557	19.4607	18.2021	20.031	21.3024	20.9946	21.2901	22.0068	21.7947	21.1199	20.8004	21.2686
3	20.4238	21.8366	23.0053	21.3641	20.0909	21.6956	22.6091	23.9743	23.6521	19.6607	18.2927	17.2112	18.0939	19.0351	19.1107	19.1199	19.9255	18.4705	20.5504	21.4314	21.0907	21.8386	22.3085	22.2452	21.3134	20.9355	21.2341
Cq Mean	20.2391	21.8303	23.0333	21.805	20.2065	21.5463	22.5867	23.8005	23.8035	19.9061	18.5516	17.3077	18.311	19.3114	19.2666	19.0874	19.6598	18.3027	20.1979	21.3478	20.8939	21.4797	22.12	22.0263	21.3008	20.9679	21.287
Hsp70	WT-21-1	WT-21-2	WT-21-3	OE1-21-1	OE1-21-2	OE1-21-3	OE2-21-1	OE2-21-2	OE2-21-3	WT-38-1	WT-38-2	WT-38-3	OE1-38-1	OE1-38-2	OE1-38-3	OE2-38-1	OE2-38-2	OE2-38-3	WT-45-1	WT-45-2	WT-45-3	OE1-45-1	OE1-45-2	OE1-45-3	OE2-45-1	OE2-45-2	OE2-45-3
1	23.3952	25.5251	26.3841	25.9401	23.9019	25.2199	25.9391	25.7422	25.8031	14.8654	11.3786	11.4065	15.4203	15.2382	15.2084	15.058	15.2564	15.5418	19.3057	19.8707	18.2034	19.445	19.6827	19.4215	17.888	18.2561	19.1141
2	23.2612	25.1932	25.9262	25.6578	23.4258	25.1734	25.8519	25.8855	25.6173	14.9154	11.0672	11.846	15.3635	14.8919	14.8718	14.9014	14.9039	14.9255	19.0451	19.5808	17.7436	19.2473	19.4591	19.1976	17.6501	17.9922	19.0135
3	23.2584	25.0537	25.775	25.6493	24.2304	25.3361	25.85	26.219	25.5652	15.303	11.2938	11.1118	15.4586	15.0189	15.1544	14.8339	15.3987	15.1951	18.7212	19.4458	18.2184	19.989	20.0096	20.21	18.1848	18.3475	19.5471
Cq Mean	23.3049	25.2573	26.0284	25.7491	23.8527	25.2431	25.8803	25.9489	25.6619	15.0279	11.2465	11.4548	15.4141	15.0497	15.0782	14.9311	15.1863	15.2208	19.024	19.6324	18.0551	19.5604	19.7171	19.6097	17.9076	18.1986	19.2249
Hsp101	WT-21-1	WT-21-2	WT-21-3	OE1-21-1	OE1-21-2	OE1-21-3	OE2-21-1	OE2-21-2	OE2-21-3	WT-38-1	WT-38-2	WT-38-3	OE1-38-1	OE1-38-2	OE1-38-3	OE2-38-1	OE2-38-2	OE2-38-3	WT-45-1	WT-45-2	WT-45-3	OE1-45-1	OE1-45-2	OE1-45-3	OE2-45-1	OE2-45-2	OE2-45-3
1	25.4623	26.6402	27.9803	27.2048	25.9165	26.221	27.1155	28.387	28.1155	18.7308	16.288	15.8958	16.5066	16.2053	16.222	16.85	17.1348	17.1823	18.8918	20.5003	18.533	19.1878	19.0142	19.7904	19.1506	18.6763	19.638
2	25.0549	26.3561	27.2409	26.657	25.1647	25.9634	26.5586	28.1182	27.9003	18.3307	16.0335	15.706	16.4352	15.9586	16.0926	16.86	16.8235	16.5228	18.5612	19.4309	18.0187	18.9185	18.651	19.4521	18.7568	18.4854	18.7072
3	25.2871	26.6818	28.0917	26.5633	24.9959	26.1315	26.5335	26.8696	27.7122	18.0435	16.2521	15.9967	16.6122	15.834	16.1735	16.87	17.0149	16.4926	19.2246	19.674	18.3932	19.0723	18.9469	19.7413	19.1278	18.6328	19.0069
Cq Mean	25.2681	26.5594	27.771	26.8084	25.359	26.1053	26.7359	27.7916	27.9093	18.3683	16.1912	15.8662	16.518	15.9993	16.1627	16.86	16.991	16.7326	18.8925	19.8684	18.3149	19.0595	18.8707	19.6613	19.0118	18.5982	19.1174
sHSP class I	WT-21-1	WT-21-2	WT-21-3	OE1-21-1	OE1-21-2	OE1-21-3	OE2-21-1	OE2-21-2	OE2-21-3	WT-38-1	WT-38-2	WT-38-3	OE1-38-1	OE1-38-2	OE1-38-3	OE2-38-1	OE2-38-2	OE2-38-3	WT-45-1	WT-45-2	WT-45-3	OE1-45-1	OE1-45-2	OE1-45-3	OE2-45-1	OE2-45-2	OE2-45-3
1	30.5666	31.625	33.2196	29.1196	29.4013	29.6973	31.7422	30.6872	32.4967	16.6857	14.1724	13.7953	15.2763	15.5959	15.3418	15.7	15.9406	15.3666	19.1355	19.7332	17.9174	19.1795	19.7899	20.8546	19.387	19.3352	20.25
2	30.7004	30.7522	33.6951	28.8259	29.5125	29.5394	30.2784	31.3324	32.2247	16.8183	14.3196	14.1868	15.0464	15.5709	15.4599	15.71	16.0027	15.4193	19.273	20.0845	18.1152	19.9269	19.7789	20.778	19.7975	19.9481	20.1216
3	30.735	31.612	33.0388	29.1909	29.1955	29.4835	30.163	31.3108	32.912	16.5068	14.0917	13.4483	14.5564	15.0368	15.0571	15.72	15.9355	15.5968	19.5652	20.0536	18.0131	20.0621	19.8813	20.4073	20.0208	19.7797	20.0865
Cq Mean	30.6674	31.3297	33.3178	29.0455	29.3698	29.5734	30.7279	31.1101	32.5445	16.6703	14.1945	13.8102	14.9597	15.4012	15.2862	15.71	15.9596	15.4609	19.3246	19.9571	18.0152	19.7228	19.8167	20.68	19.7351	19.6877	20.1527
sHSP class II	WT-21-1	WT-21-2	WT-21-3	OE1-21-1	OE1-21-2	OE1-21-3	OE2-21-1	OE2-21-2	OE2-21-3	WT-38-1	WT-38-2	WT-38-3	OE1-38-1	OE1-38-2	OE1-38-3	OE2-38-1	OE2-38-2	OE2-38-3	WT-45-1	WT-45-2	WT-45-3	OE1-45-1	OE1-45-2	OE1-45-3	OE2-45-1	OE2-45-2	OE2-45-3
1	29.3489	30.1729	34.1269	28.7337	27.9617	28.1669	28.4076	30.1737	30.408	17.494	15.4594	15.0506	16.3937	17.1176	16.9488	16.29	16.49	16.9577	19.2562	19.8178	18.5279	20.6383	20.8212	20.6962	19.588	19.5114	19.4559
2	29.7235	30.1252	33.469	28.6549	28.1573	28.1426	28.5345	30.3002	30.9661	17.4177	15.4087	14.9912	16.1362	16.8189	16.6834	16.3	16.5	16.1666	19.0605	19.8479	18.2949	20.0808	20.5661	20.8804	20.1854	19.7198	20.0845
3	29.496	29.9521	33.0549	28.1686	27.6682	29.0017	29.3384	30.9402	31.4301	17.8609	15.8372	15.6183	16.3688	16.9327	17.1212	16.31	16.51	16.0885	19.0159	19.6872	18.5064	19.9332	20.2553	20.7855	20.2371	20.5461	20.1919
Cq Mean	29.5228	30.0834	33.5503	28.5191	27.9291	28.4371	28.7601	30.4713	30.9347	17.5909	15.5685	15.22	16.2996	16.9564	16.9178	16.3	16.5	16.4043	19.1109	19.7843	18.4431	20.2174	20.5475	20.7874	20.0035	19.9258	19.9108
	Cq Mean								_△CT							2∧-△CT
	Act2	HsfA2	HsfB1	Hsp60	Hsp70	Hsp101	sHSP class I	sHSP class II	HsfA2	HsfB1	Hsp60	Hsp70	Hsp101	sHSP class I	sHSP class II	HsfA2	HsfB1	Hsp60	Hsp70	Hsp101	sHSP class I	sHSP class II
WT-21-1	19.1232	27.5735	22.512	20.2391	23.3049	25.2681	30.6674	29.5228	-8.45034	-3.38881	-1.1159	-4.18173	-6.14489	-11.5442	-10.3996	0.00285887	0.0954702	0.461403	0.0551027	0.014132	0.00033486	0.000740294
WT-21-2	22.3776	30.4354	24.1547	21.8303	25.2573	26.5594	31.3297	30.0834	-8.05776	-1.77712	0.547308	-2.87973	-4.18175	-8.95211	-7.70578	0.00375294	0.291765	1.46136	0.135867	0.0551019	0.00201905	0.00478992
WT-21-3	21.2726	30.8376	25.2609	23.0333	26.0284	27.771	33.3178	33.5503	-9.56509	-3.98837	-1.76079	-4.75589	-6.49844	-12.0453	-12.2777	0.00132015	0.0630059	0.295087	0.0370113	0.0110605	0.000236597	0.000201391
OE1-21-1	21.2937	30.1954	24.5955	21.805	25.7491	26.8084	29.0455	28.5191	-8.90171	-3.30179	-0.511367	-4.45539	-5.51469	-7.75177	-7.22538	0.00209082	0.101406	0.701557	0.0455819	0.0218732	0.00463963	0.0066826
OE1-21-2	18.9503	28.145	23.1186	20.2065	23.8527	25.359	29.3698	27.9291	-9.19468	-4.16831	-1.25618	-4.9024	-6.40872	-10.4194	-8.97875	0.00170658	0.0556179	0.41865	0.0334373	0.0117702	0.00073019	0.00198211
OE1-21-3	19.6041	29.8489	24.0408	21.5463	25.2431	26.1053	29.5734	28.4371	-10.2448	-4.43665	-1.94216	-5.63896	-6.50114	-9.96928	-8.83292	0.000824162	0.0461779	0.260227	0.0200679	0.0110398	0.000997581	0.00219294
OE2-21-1	20.527	30.5305	24.5391	22.5867	25.8803	26.7359	30.7279	28.7601	-10.0035	-4.01218	-2.0597	-5.35337	-6.20893	-10.2009	-8.23318	0.00097418	0.0619746	0.239866	0.0244611	0.0135184	0.000849592	0.00332326
OE2-21-2	22.126	31.4126	25.4977	23.8005	25.9489	27.7916	31.1101	30.4713	-9.28658	-3.37173	-1.67453	-3.82292	-5.66562	-8.98417	-8.34538	0.00160125	0.0966071	0.313268	0.0706621	0.0197006	0.00197467	0.00307461
OE2-21-3	22.3147	30.8566	25.7971	23.8035	25.6619	27.9093	32.5445	30.9347	-8.54183	-3.48239	-1.48876	-3.34715	-5.59461	-10.2298	-8.61999	0.00268319	0.0894736	0.356319	0.0982671	0.0206944	0.000832791	0.00254171
WT-38-1	22.1964	18.3313	19.1933	19.9061	15.0279	18.3683	16.6703	17.5909	3.86513	3.00317	2.29031	7.16851	3.82812	5.52619	4.60558	14.5721	8.01762	4.8916	143.859	14.203	46.0839	24.3454
WT-38-2	19.3035	15.9404	17.185	18.5516	11.2465	16.1912	14.1945	15.5685	3.36304	2.1185	0.751908	8.05694	3.1123	5.10894	3.73503	10.2891	4.34242	1.68402	266.307	8.6476	34.51	13.3154
WT-38-3	18.6644	16.6619	17.1116	17.3077	11.4548	15.8662	13.8102	15.22	2.00248	1.55277	1.35667	7.2096	2.79816	4.85419	3.44436	4.00689	2.9338	2.56093	148.015	6.95554	28.9239	10.8857
OE1-38-1	19.8941	17.7809	17.9267	18.311	15.4141	16.518	14.9597	16.2996	2.11321	1.96747	1.58319	4.48002	3.37616	4.93446	3.59455	4.32653	3.91082	2.99631	22.3163	10.3831	30.5788	12.08
OE1-38-2	19.8726	17.2981	17.415	19.3114	15.0497	15.9993	15.4012	16.9564	2.57446	2.45761	0.561189	4.82292	3.87329	4.47137	2.91621	5.95649	5.49307	1.47548	28.3037	14.6547	22.1829	7.54862
OE1-38-3	19.7802	17.2759	17.3191	19.2666	15.0782	16.1627	15.2862	16.9178	2.50427	2.46115	0.513653	4.70203	3.61751	4.49398	2.86241	5.67363	5.50657	1.42766	26.0287	12.2738	22.5331	7.2723
OE2-38-1	19.91	18.0382	17.6646	19.0874	14.9311	16.86	15.71	16.3	1.87188	2.24541	0.822673	4.97894	3.05005	4.20005	3.61005	3.66009	4.74173	1.76868	31.5364	8.28238	15.71	15.9596
OE2-38-2	20.6288	17.8704	18.2904	19.6598	15.1863	16.991	15.9596	16.5	2.75833	2.33837	0.96891	5.44242	3.63773	4.66914	4.12876	6.7661	5.0573	1.95736	43.4843	12.447	25.442	17.4936
OE2-38-3	19.7475	17.3571	17.8668	18.3027	15.2208	16.7326	15.4609	16.4043	2.39042	1.88075	1.44478	4.52674	3.01496	4.2866	3.34326	5.24309	3.68268	2.72221	23.0507	8.08341	19.5162	10.149
WT-45-1	21.1212	19.9025	19.9343	20.1979	19.024	18.8925	19.3246	19.1109	1.21874	1.18687	0.923315	2.09719	2.22867	1.79664	2.01034	2.32744	2.27659	1.89647	4.27876	4.68701	3.47409	4.02876
WT-45-2	21.1866	20.8607	20.5694	21.3478	19.6324	19.8684	19.9571	19.7843	0.325868	0.617183	-0.161293	1.55415	1.31816	1.22945	1.40224	1.25342	1.53388	0.894224	2.9366	2.49348	2.34478	2.64311
WT-45-3	20.6417	19.7901	20.3967	20.8939	18.0551	18.3149	18.0152	18.4431	0.851549	0.24493	-0.252256	2.58654	2.32674	2.62646	2.19859	1.80444	1.18503	0.839583	6.00655	5.01669	6.17508	4.59032
OE1-45-1	21.3992	21.0464	20.2418	21.4797	19.5604	19.0595	19.7228	20.2174	0.352865	1.15742	-0.0804782	1.83879	2.3397	1.67637	1.18178	1.27709	2.23058	0.945744	3.5771	5.06196	3.19624	2.26857
OE1-45-2	21.014	21.2587	20.4561	22.12	19.7171	18.8707	19.8167	20.5475	-0.0323133	0.55795	-1.10598	1.29691	2.14332	1.19736	0.466504	0.977851	1.47218	0.464588	2.45701	4.41778	2.2932	1.38176
OE1-45-3	22.5815	21.0601	20.6069	22.0263	19.6097	19.6613	20.68	20.7874	1.32287	1.97461	0.555213	2.97184	2.92025	1.90156	1.79417	2.50164	3.93021	1.46939	7.84534	7.56975	3.73618	3.46815
OE2-45-1	21.0633	19.9105	20.0287	21.3008	17.9076	19.0118	19.7351	20.0035	0.00326949	1.03462	-0.237486	3.1557	2.05157	1.32824	1.05982	1.00227	2.04857	0.848222	8.91168	4.14557	2.51095	2.08467
OE2-45-2	21.401	19.7093	20.1747	20.9679	18.1986	18.5982	19.6877	19.9258	1.4905	1.22626	0.433031	3.20239	2.80281	1.71329	1.4752	2.80986	2.33959	1.35007	9.2048	6.97799	3.27907	2.78021
OE2-45-3	21.5772	20.3265	21.032	21.287	19.2249	19.1174	20.1527	19.9108	1.86791	0.545175	0.290203	2.3523	2.45987	1.4245	1.66644	3.65004	1.4592	1.22281	5.10639	5.50166	2.68421	3.1743
2∧-△CT
HsfA2	WT-21	OE1-21	OE2-21	WT-38	OE1-38	OE2-38	WT-45	OE1-45	OE2-45
1	0.00285887	0.00209082	0.00097418	14.5721	4.32653	3.66009	2.32744	1.27709	1.00227
2	0.00375294	0.00170658	0.00160125	10.2891	5.95649	6.7661	1.25342	0.977851	2.80986
3	0.00132015	0.000824162	0.00268319	4.00689	5.67363	5.24309	1.80444	2.50164	3.65004
2∧-△CT Mean	0.00264398	0.00154052	0.00175288	9.62267	5.31889	5.22309	1.7951	1.58553	2.48739
	1	0.582648	0.662964	3639.44	2011.68	1975.45	678.933	599.67	940.767
SD	0.00123055	0.000649453	0.000864537	5.31402	0.870966	1.5531	0.537072	0.80736	1.35302
	0.465412	0.245633	0.326981	2009.84	329.412	587.406	203.129	305.356	511.731
HsfB1	WT-21	OE1-21	OE2-21	WT-38	OE1-38	OE2-38	WT-45	OE1-45	OE2-45
1	0.0954702	0.101406	0.0619746	8.01762	3.91082	4.74173	2.27659	2.23058	2.04857
2	0.291765	0.0556179	0.0966071	4.34242	5.49307	5.0573	1.53388	1.47218	2.33959
3	0.0630059	0.0461779	0.0894736	2.9338	5.50657	3.68268	1.18503	3.93021	1.4592
2∧-△CT Mean	0.15008	0.0677338	0.0826851	5.09795	4.97015	4.4939	1.66517	2.54432	1.94912
	1	0.451318	0.55094	33.9682	33.1167	29.9434	11.0952	16.9531	12.9872
SD	0.123771	0.0295402	0.018287	2.62477	0.917436	0.720043	0.557494	1.2587	0.448544
	0.824703	0.196829	0.121849	17.4891	6.11298	4.79773	3.71465	8.38683	2.9887
Hsp60	WT-21	OE1-21	OE2-21	WT-38	OE1-38	OE2-38	WT-45	OE1-45	OE2-45
1	0.461403	0.701557	0.239866	4.8916	2.99631	1.76868	1.89647	0.945744	0.848222
2	1.46136	0.41865	0.313268	1.68402	1.47548	1.95736	0.894224	0.464588	1.35007
3	0.295087	0.260227	0.356319	2.56093	1.42766	2.72221	0.839583	1.46939	1.22281
2∧-△CT Mean	0.739282	0.460145	0.303151	3.04552	1.96649	2.14942	1.21009	0.959906	1.14037
	1	0.622421	0.410062	4.11956	2.65999	2.90744	1.63685	1.29843	1.54253
SD	0.63084	0.223572	0.058882	1.65779	0.892177	0.504947	0.595047	0.502548	0.260883
	0.853314	0.302418	0.0796476	2.24243	1.20682	0.683023	0.804899	0.679779	0.352887
Hsp70	WT-21	OE1-21	OE2-21	WT-38	OE1-38	OE2-38	WT-45	OE1-45	OE2-45
1	0.0551027	0.0455819	0.0244611	143.859	22.3163	31.5364	4.27876	3.5771	8.91168
2	0.135867	0.0334373	0.0706621	266.307	28.3037	43.4843	2.9366	2.45701	9.2048
3	0.0370113	0.0200679	0.0982671	148.015	26.0287	23.0507	6.00655	7.84534	5.10639
2∧-△CT Mean	0.0759936	0.0330291	0.0644634	186.06	25.5496	32.6905	4.40731	4.62648	7.74096
	1	0.434627	0.84827	2448.35	336.205	430.171	57.9955	60.8796	101.863
SD	0.0526349	0.0127619	0.0372914	69.5266	3.02231	10.2656	1.539	2.84331	2.2863
	0.692619	0.167933	0.490715	914.896	39.7704	135.084	20.2517	37.4149	30.0853
Hsp101	WT-21	OE1-21	OE2-21	WT-38	OE1-38	OE2-38	WT-45	OE1-45	OE2-45
1	0.014132	0.0218732	0.0135184	14.203	10.3831	8.28238	4.68701	5.06196	4.14557
2	0.0551019	0.0117702	0.0197006	8.6476	14.6547	12.447	2.49348	4.41778	6.97799
3	0.0110605	0.0110398	0.0206944	6.95554	12.2738	8.08341	5.01669	7.56975	5.50166
2∧-△CT Mean	0.0267648	0.0148944	0.0179711	9.93538	12.4372	9.60426	4.06573	5.68316	5.54174
	1	0.556488	0.671441	371.208	464.681	358.837	151.905	212.336	207.052
SD	0.0245887	0.00605487	0.00388807	3.79146	2.14049	2.46389	1.37155	1.66528	1.41664
	0.918688	0.226223	0.145267	141.658	79.9736	92.0563	51.2441	62.2185	52.9287
sHSP class I	WT-21	OE1-21	OE2-21	WT-38	OE1-38	OE2-38	WT-45	OE1-45	OE2-45
1	0.00033486	0.00463963	0.000849592	46.0839	30.5788	15.71	3.47409	3.19624	2.51095
2	0.00201905	0.00073019	0.00197467	34.51	22.1829	25.442	2.34478	2.2932	3.27907
3	0.000236597	0.000997581	0.000832791	28.9239	22.5331	19.5162	6.17508	3.73618	2.68421
2∧-△CT Mean	0.000863502	0.00212247	0.00121902	36.5059	25.0983	20.2227	3.99798	3.0752	2.82474
	1	2.45656	1.4109	42252.2	29048.9	23406	4627.3	3559.26	3269.38
SD	0.00100194	0.00218402	0.00065447	8.7524	4.74953	4.90434	1.96816	0.729064	0.402879
	1.15965	2.5278	0.757488	10130.1	5497.14	5676.31	2277.96	843.825	466.295
sHSP class II	WT-21	OE1-21	OE2-21	WT-38	OE1-38	OE2-38	WT-45	OE1-45	OE2-45
1	0.000740294	0.0066826	0.00332326	24.3454	12.08	15.9596	4.02876	2.26857	2.08467
2	0.00478992	0.00198211	0.00307461	13.3154	7.54862	17.4936	2.64311	1.38176	2.78021
3	0.000201391	0.00219294	0.00254171	10.8857	7.2723	10.149	4.59032	3.46815	3.1743
2∧-△CT Mean	0.00191054	0.00361922	0.00297986	16.1822	8.96699	14.5341	3.75406	2.37283	2.67973
	1	1.89389	1.55932	8467.9	4692.3	7605.48	1964.45	1241.67	1402.26
SD	0.00250814	0.00265506	0.000399301	7.17319	2.69953	3.87428	1.00225	1.0471	0.551718
	1.31247	1.38936	0.208949	3753.63	1412.63	2027.36	524.462	547.931	288.707
